# Supplementary material for: In situgrowth of MOF-derived sulfur vacancy-rich CdS nanoparticles on 2D polymers for highly efficient photocatalytic hydrogen generation
Source: Royal Society of Chemistry journal article supplement (doi:10.1039/d1dt04188f), 2022-01-01
Supplement: d1dt04188f1.pdf [file d1dt04188f1.pdf]

## Supporting Information for

### MOF-derived sulfur vacancies rich CdS nanoparticles in situ growth on 2D polymer for highly efficient photocatalytic hydrogen generation

Jinyan Shi,<sup>a,b</sup> Jie Zhang,<sup>a,b</sup> Zhiwei Cui,<sup>a,b</sup> Siqi Chu,<sup>a,b</sup> Ying Wang\*<sup>a,b</sup> and Zhigang Zou<sup>b</sup>

E-mail: wangy@nju.edu.cn

<sup>a</sup>School of Chemistry and Chemical Engineering, Nanjing University, Nanjing, 210023, P. R. China.

<sup>b</sup>Eco-materials and Renewable Energy Research Center (ERERC), National Laboratory of Solid State Microstructures, Kunshan Innovation Institute of Nanjing University, Jiangsu Key Laboratory for Nanotechnology, Nanjing University, Nanjing, 210093, P. R. China.

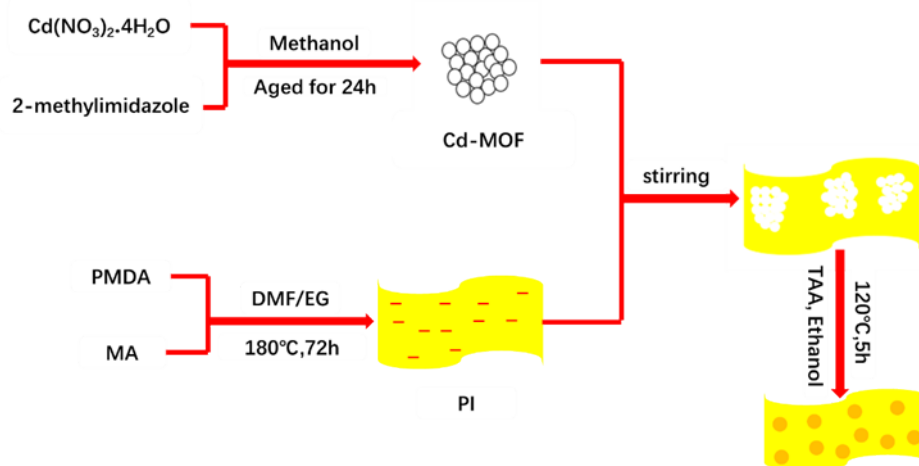

Fig. S1 Schematic illustration of the formation process of 18%CdS(MOF)/PI structures

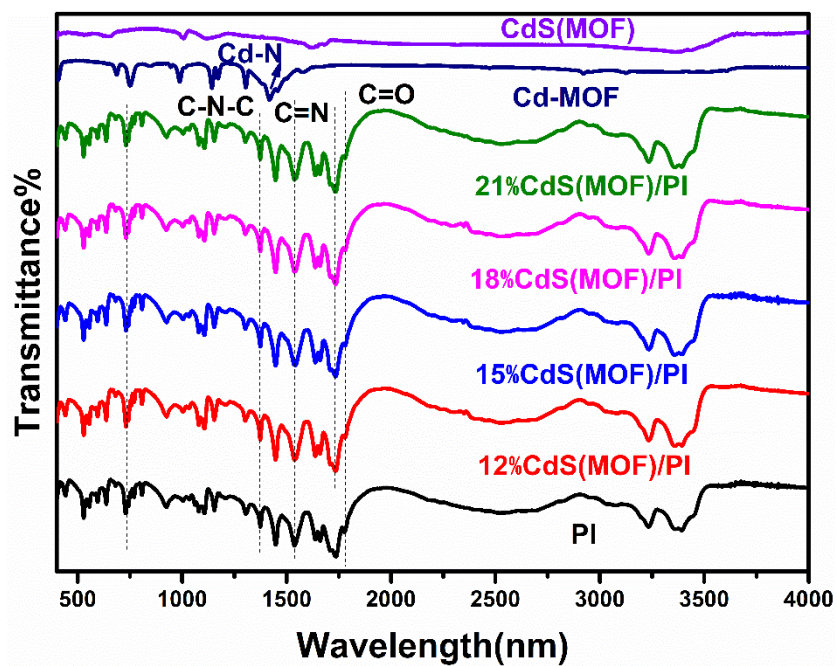

Fig. S2 FT-IR spectra of PI and CdS(MOF)/PI samples

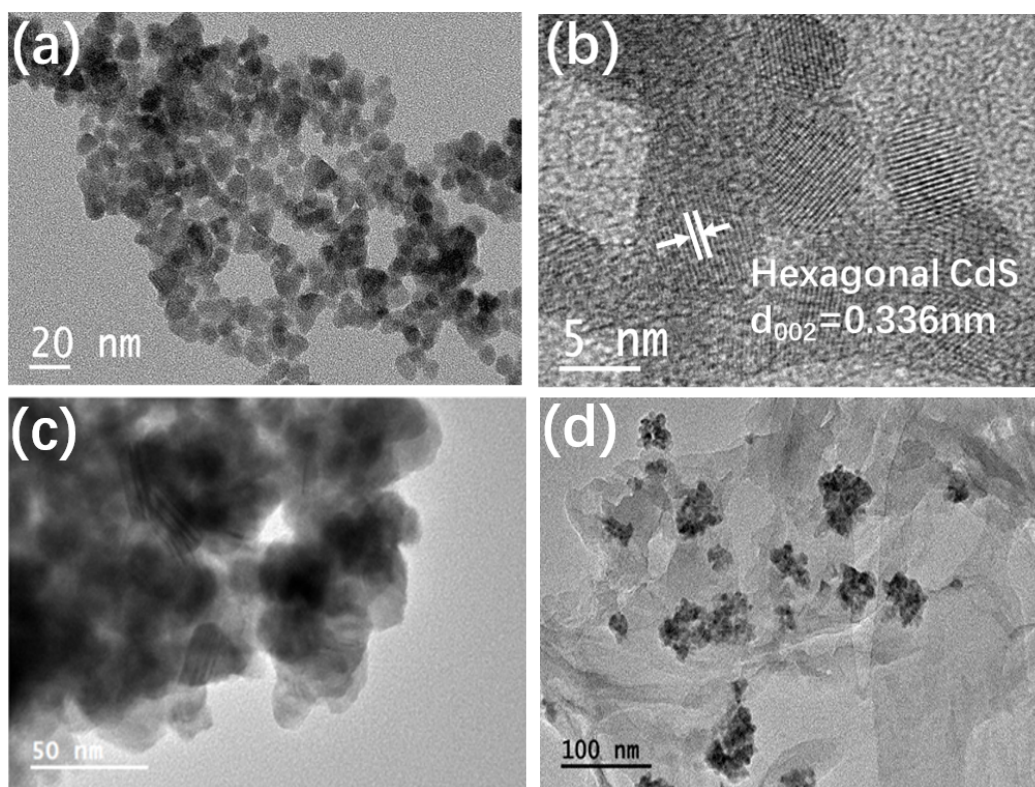

Fig. S3 TEM and HRTEM of (a-b) CdS (MOF), (c) CdS and (d)18%CdS/PI

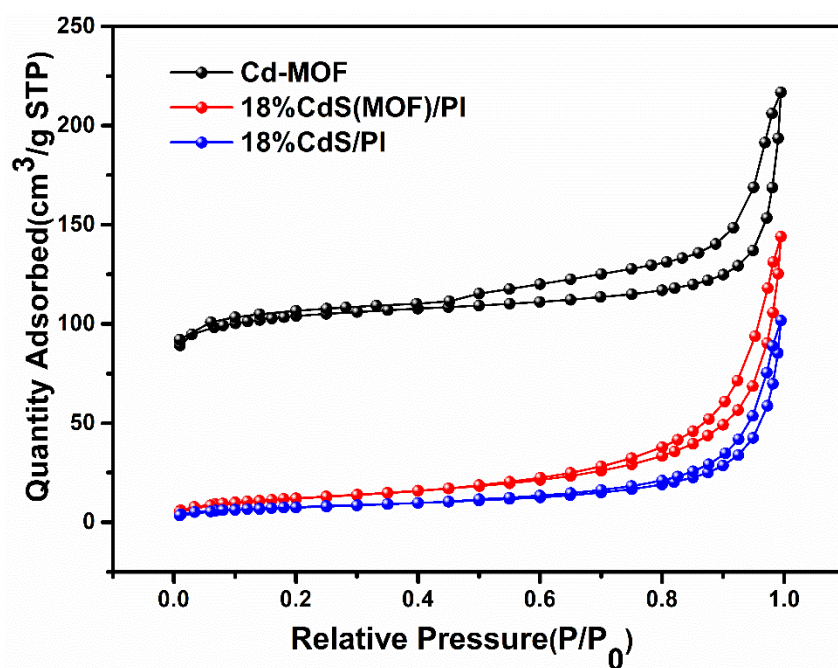

Fig. S4 N<sub>2</sub> adsorption/desorption isotherms of Cd-MOF, 18%CdS/PI-MOF and CdS/PI

Table S1 Structural parameters obtained from N<sub>2</sub> adsorption isotherms analysis

| Samples         | $S_{\text{BET}}$ ( $\text{m}^2 \cdot \text{g}^{-1}$ ) | Pore volume ( $\text{cm}^3 \cdot \text{g}^{-1}$ ) | Average pore size (nm) |
|-----------------|-------------------------------------------------------|---------------------------------------------------|------------------------|
| PI              | 20.1                                                  | 0.08                                              | 21.66                  |
| Cd-MOF          | 350.8                                                 | 0.24                                              | 27.06                  |
| 18% CdS(MOF)/PI | 44.9                                                  | 0.14                                              | 12.46                  |
| 18%CdS/PI       | 27.9                                                  | 0.10                                              | 13.05                  |

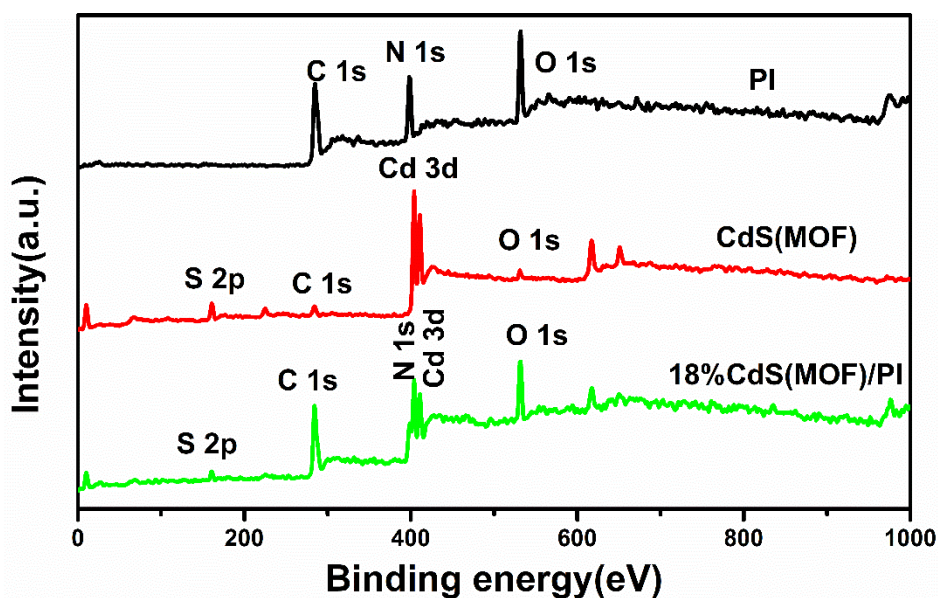

Fig. S5 XPS survey spectra of PI, CdS-MOF and 18%CdS/PI-MOF samples.

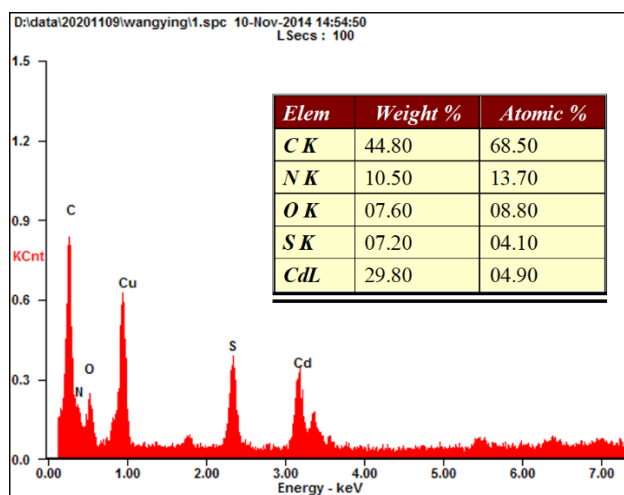

Fig. S6 energy-dispersive X-ray spectroscopy (EDS) of the 18%CdS (MOF)/PI

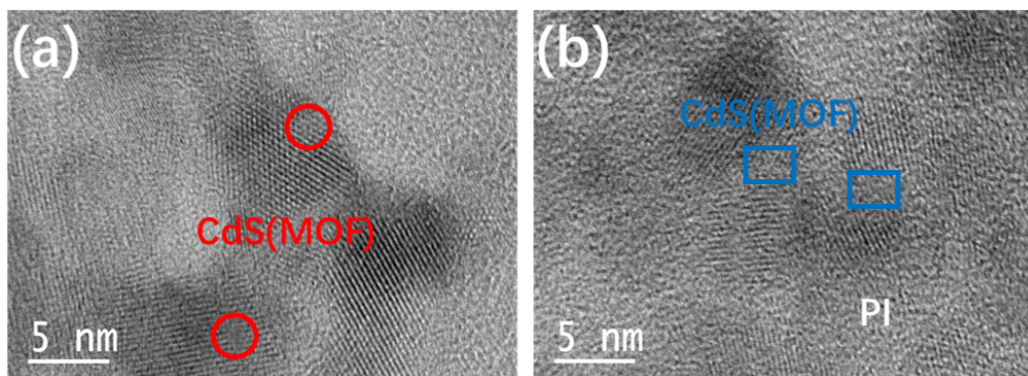

Fig. S7 HRTEM of (a) CdS (MOF) and (b) 18%CdS(MOF)/PI

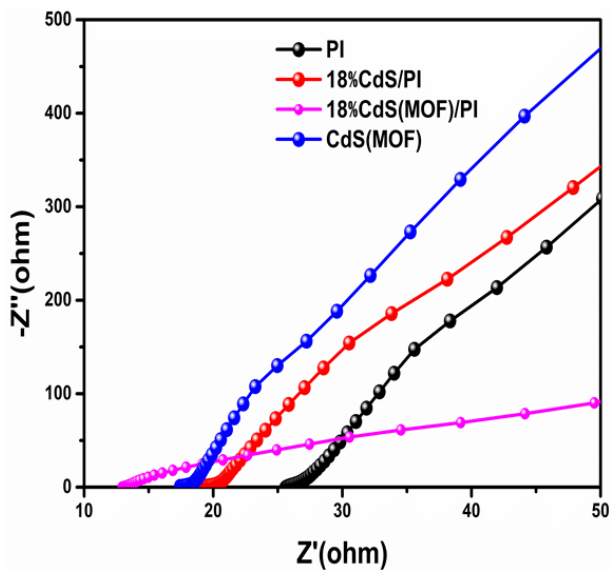

Fig. S8 Amplified pattern of high-frequency range of EIS spectra.



Table S2 Comparison of the H<sub>2</sub>-production rates of CdS-polymer composite photocatalysts for water splitting.

| Photocatalyst                                            | Light source        | Sacrificial agent                                 | Noble metal cocatalyst | Activity $\mu\text{mol}\cdot\text{g}^{-1}\cdot\text{h}^{-1}$ | Ref |
|----------------------------------------------------------|---------------------|---------------------------------------------------|------------------------|--------------------------------------------------------------|-----|
| N-GR/CdS                                                 | (300W Xe)<br>>420nm | Na <sub>2</sub> S/Na <sub>2</sub> SO <sub>3</sub> | none                   | 1050                                                         | [1] |
| RGO-ZnCdS                                                | Solar simulator     | Na <sub>2</sub> S/Na <sub>2</sub> SO <sub>3</sub> | none                   | 1820.4                                                       | [2] |
| CdS/TNT                                                  | (500W Xe)<br>>430nm | Na <sub>2</sub> S/Na <sub>2</sub> SO <sub>3</sub> | Pt                     | 1760.7                                                       | [3] |
| CdS/CNTs                                                 | (350W Xe)<br>>420nm | Na <sub>2</sub> S/Na <sub>2</sub> SO <sub>3</sub> | none                   | 794.6                                                        | [4] |
| GO/CdS                                                   | (350W Xe)<br>>420nm | -                                                 | Pt                     | 1120                                                         | [5] |
| CdS/g-C <sub>3</sub> N <sub>4</sub>                      | (300W Xe)<br>>420nm | Na <sub>2</sub> S/Na <sub>2</sub> SO <sub>3</sub> | Pt                     | 4152                                                         | [6] |
| Ni(OH) <sub>2</sub> -CdS/g-C <sub>3</sub> N <sub>4</sub> | (300W Xe)<br>>420nm | Na <sub>2</sub> S/Na <sub>2</sub> SO <sub>3</sub> | Ni                     | 115.18                                                       | [7] |
| CdS/PANI                                                 | (300W Xe)<br>>420nm | Na <sub>2</sub> S/Na <sub>2</sub> SO <sub>3</sub> | none                   | 310                                                          | [8] |
| <b>This work</b>                                         | (300W Xe)<br>>420nm | Lactic acid                                       | none                   | 2160                                                         | /   |

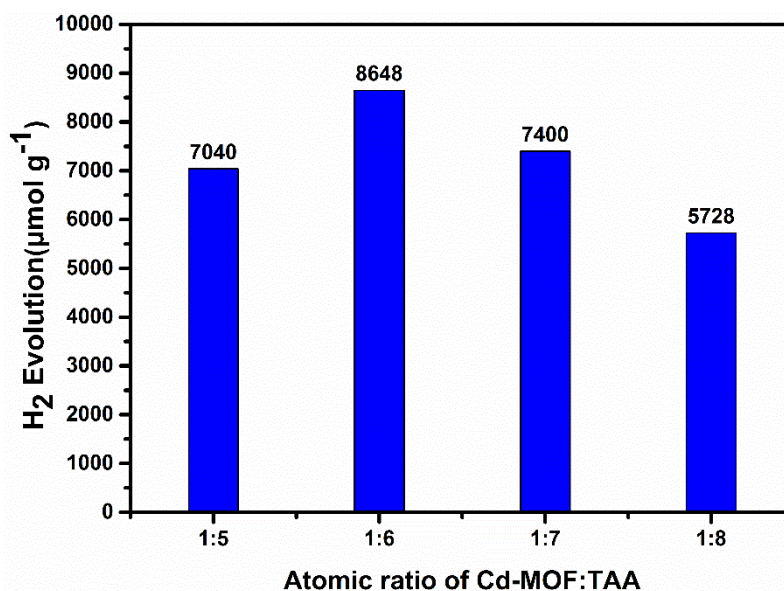

Fig. S9 The photocatalytic H<sub>2</sub> production of 18%CdS (MOF)/PI photocatalysts synthesized from different atomic ratio of Cd-MOF: TAA after 4 hours of illumination

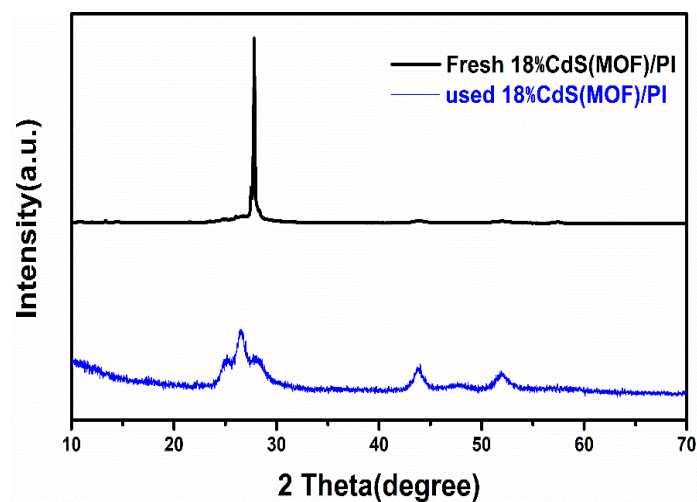

Fig. S10 XRD patterns of fresh and used 18%CdS(MOF)/PI samples.

- [1] L. Jia, D.-H. Wang, Y.-X. Huang, A.-W. Xu and H.-Q. Yu, *J. Phys. Chem. C*. 2011, 115, 11466-11473.
- [2] J. Zhang, J. Yu, M. Jaroniec and J. R. Gong, *Nano Lett.* 2012, 12, 4584-589.
- [3] Y. Chen, L. Wang, G. M. Lu, X. Yao and L. Guo, *J. Mater. Chem.* 2011, 21, 5134-5141.
- [4] X. Wang, M. Liu, Q. Chen, K. Zhang, J. Chen, M. Wang, P. Guo and L. Guo, *Int. J. Hydrogen Energy*, 2013, 38, 13091-13096.
- [5] Q. Li, B. Guo, J. Yu, J. Ran, B. Zhang, H. Yan and J. R. Gong, *J. Am. Chem. Soc.* 2011, 133, 10878-10884.
- [6] J. Zhang, Y. Wang, J. Jin, J. Zhang, Z. Lin, F. Huang and J. Yu, *ACS Appl. Mater. Interfaces*. 2013, 5, 10317-10324.
- [7] Z. Yan, Z. Sun, X. Liu, H. Jia and P. Du, *Nanoscale*. 2016, 8, 4748-4756.
- [8] Wang, C. Wang, L. Jin, J. Liu, J. Li, Y. Wu, M. Chen, L. Wang, B. Yang, X.; Su, B.-L, *Applied Catalysis B: Environmental*. 2016, 188, 351-359.
